# Supplementary material for: Introducing two types of psychological resilience with partly unique genetic and environmental sources
Source: PubMed Central journal article supplement (PMC8060303; doi:10.1038/s41598-021-87581-5), 2021-04-21
Supplement: 41598_2021_87581_MOESM1_ESM.pdf [file 41598_2021_87581_MOESM1_ESM.pdf]

## **Supplementary Information to**

# **Introducing Two Types of Psychological Resilience with Partly Unique Genetic and Environmental Sources**

Live Skow Hofgaard\* <sup>1</sup>

Ragnhild Bang Nes <sup>1,2</sup>

Espen Røysamb <sup>1,2</sup>

<sup>1</sup> Promenta Research Centre, Department of Psychology, University of Oslo, Norway.

<sup>2</sup> The Norwegian Institute of Public Health, Norway.

\* Corresponding author: Live Skow Hofgaard, mail: [l.s.hofgaard@psykologi.uio.no](mailto:l.s.hofgaard@psykologi.uio.no)

## Table of Contents

|                             |   |
|-----------------------------|---|
| Supplementary Tables .....  | 1 |
| Table S1 .....              | 2 |
| Supplementary Figures ..... | 3 |
| Figure S1 .....             | 3 |
| Figure S2 .....             | 3 |
| Figure S3 .....             | 4 |
| Figure S4 .....             | 4 |

## Supplementary Tables

Table S1  
*Pearson correlations between all variables*

| Variable                         | 1       | 2       | 3      | 4       | 5       | 6       | 7       | 8       | 9       | 10      | 11      | 12      | 13      | 14      | 15      | 16      | 17      | 18     |  |
|----------------------------------|---------|---------|--------|---------|---------|---------|---------|---------|---------|---------|---------|---------|---------|---------|---------|---------|---------|--------|--|
| 1. Educational Background        |         |         |        |         |         |         |         |         |         |         |         |         |         |         |         |         |         |        |  |
| 2. Self-Rated Health             | .214**  |         |        |         |         |         |         |         |         |         |         |         |         |         |         |         |         |        |  |
| 3. Physical Activity             | .126**  | .221**  |        |         |         |         |         |         |         |         |         |         |         |         |         |         |         |        |  |
| 4. Meaning in Life               | .198**  | .362**  | .068** |         |         |         |         |         |         |         |         |         |         |         |         |         |         |        |  |
| 5. Positive Affect               | .093**  | .279**  | .086** | .552**  |         |         |         |         |         |         |         |         |         |         |         |         |         |        |  |
| 6. Loneliness                    | -.041   | -.173** | -.033  | -.427** | -.379** |         |         |         |         |         |         |         |         |         |         |         |         |        |  |
| 7. Relationship satisfaction     | -.005   | .152**  | .031   | .388**  | .414**  | -.396** |         |         |         |         |         |         |         |         |         |         |         |        |  |
| 8. Social Support                | .093**  | .067**  | .097** | .180**  | .218**  | -.276** | .098**  |         |         |         |         |         |         |         |         |         |         |        |  |
| 9. Optimism                      | .224**  | .284**  | .070** | .414**  | .453**  | -.343** | .286**  | .207**  |         |         |         |         |         |         |         |         |         |        |  |
| 10. Trust                        | .162**  | .148**  | .089** | .274**  | .249**  | -.273** | .168**  | .210**  | .344**  |         |         |         |         |         |         |         |         |        |  |
| 11. Self-efficacy                | .160**  | .201**  | .028   | .360**  | .370**  | -.263** | .211**  | .092**  | .414**  | .164**  |         |         |         |         |         |         |         |        |  |
| 12. Anxious Attachment           | -.077** | -.195** | -.057* | -.291** | -.280** | .389**  | -.334** | -.117** | -.365** | -.223** | -.230** |         |         |         |         |         |         |        |  |
| 13. Avoidant Attachment          | -.061** | -.161** | -.054* | -.360** | -.385** | .430**  | -.612** | -.173** | -.350** | -.201** | -.195** | .476**  |         |         |         |         |         |        |  |
| 14. Type 1 Resilience            | .165**  | .318**  | .066** | .425**  | .356**  | -.357** | .282**  | .093**  | .368**  | .182**  | .311**  | -.327** | -.289** |         |         |         |         |        |  |
| 15. Type 2 Resilience            | .180**  | .384**  | .078** | .610**  | .575**  | -.352** | .459**  | .134**  | .383**  | .213**  | .367**  | -.281** | -.361** | .445**  |         |         |         |        |  |
| 16. Lifetime Stressors           | .054*   | -.195** | -.020  | -.189** | -.139** | .257**  | -.242** | .031    | -.104** | -.153** | -.039   | .178**  | .175**  | .000    | .000    |         |         |        |  |
| 17. Satisfaction With Life Scale | .150**  | .431**  | .073** | .658**  | .572**  | -.415** | .503**  | .106**  | .411**  | .242**  | .356**  | -.310** | -.394** | .461**  | .912**  | -.310** |         |        |  |
| 18. Symptom Checklist (SCL-8)    | -.147** | -.361** | -.056* | -.470** | -.359** | .399**  | -.336** | -.071** | -.372** | -.211** | -.310** | .353**  | .322**  | -.865** | -.393** | .334**  | -.534** |        |  |
| 19. Birth Year (age)             | .118**  | .036    | -.022  | .030    | .056*   | -.002   | .012    | .057*   | .094**  | .029    | .067**  | -.042   | -.092** | -.043   | .017    | .101**  | -.016   | .061** |  |

\*\* . Correlation is significant at the 0.01 level (2-tailed).

\* . Correlation is significant at the 0.05 level (2-tailed).

**Supplementary Figures**

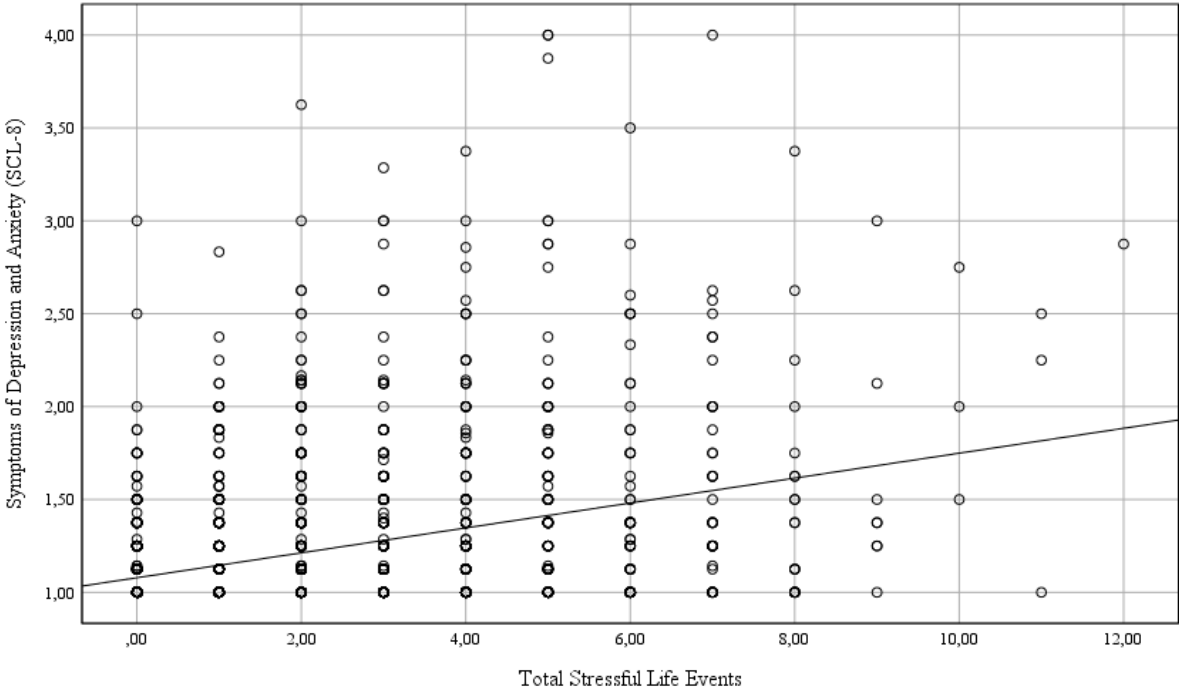

Figure S1: The relationship between symptoms of depression and anxiety (SCL) and total stressful life events experienced.  $R^2$  Linear = .112.

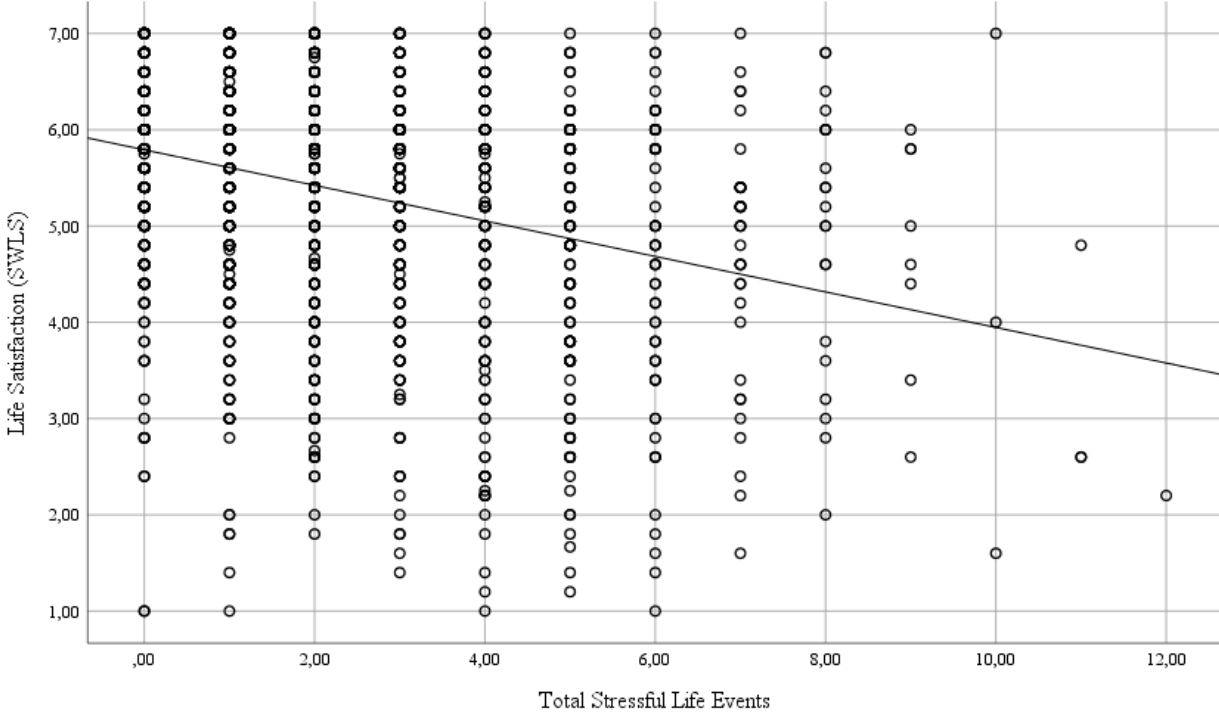

Figure S2: The relationship between life satisfaction (SWLS) and total stressful life events experienced.  $R^2$  Linear = .096.

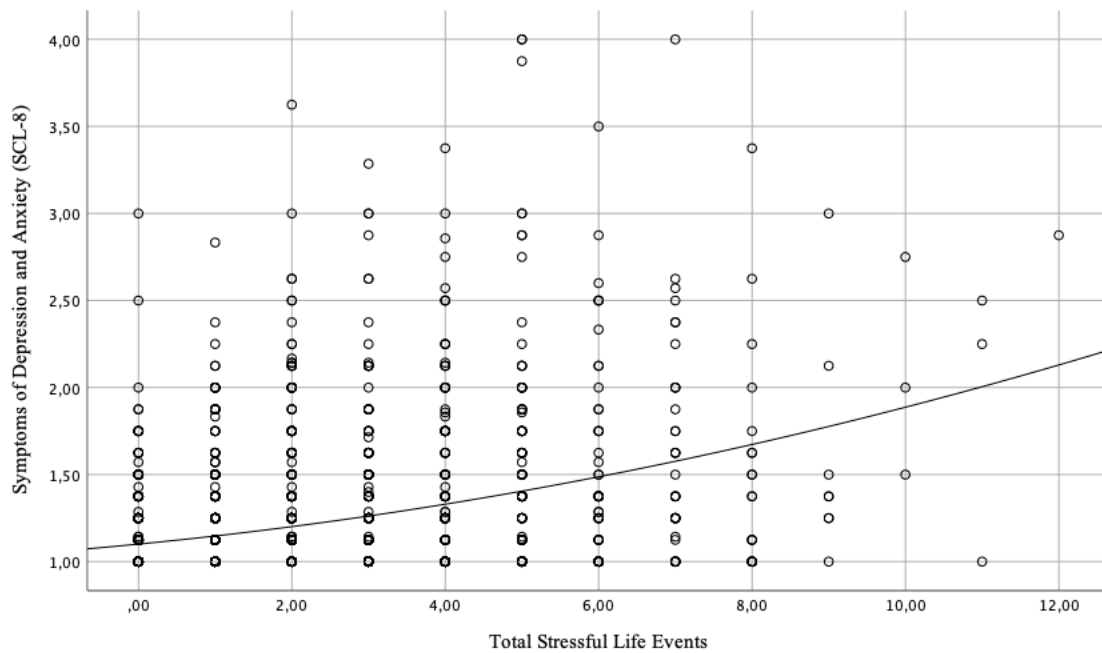

Figure S3: The relationship between symptoms of depression and anxiety (SCL) and total stressful life events experienced.  $R^2$  Quadratic = .114.

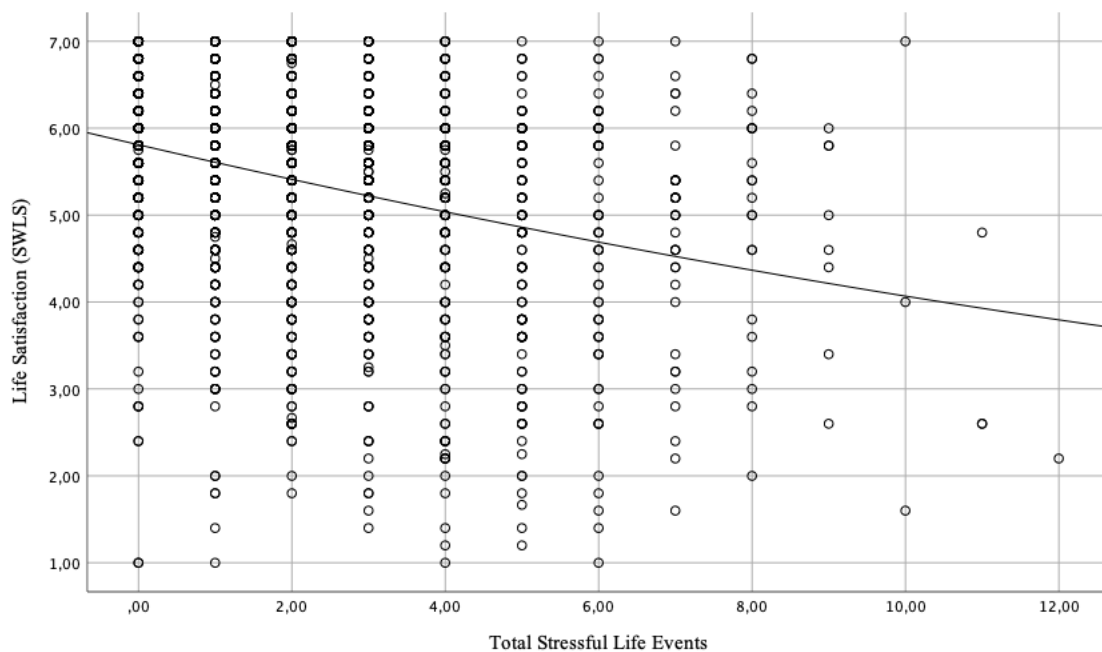

Figure S4: The relationship between life satisfaction (SWLS) and total stressful life events experienced.  $R^2$  Quadratic = .096.
